# Supplementary material for: Effect of a Combination of Magnesium, B Vitamins, Rhodiola, and Green Tea (L-Theanine) on Chronically Stressed Healthy Individuals—A Randomized, Placebo-Controlled Study
Source: MDPI journal article supplement (doi:10.3390/nu14091863), 2022-04-29
Supplement: s1 [file s1]

## Supplementary material

**Table S1.** Non-serious adverse events reported in the study (safety set).

| AE (verbatim)            | Mg-Teadiola<br>n=51 |                                  | Placebo<br>n=55 |                                  |
|--------------------------|---------------------|----------------------------------|-----------------|----------------------------------|
|                          | Events<br>n         | Number of participants<br>n' (%) | Events<br>n     | Number of participants<br>n' (%) |
| Headaches/migraines      | 23                  | 16 (31.4)                        | 32              | 21 (38.2)                        |
| Musculoskeletal pain     | 14                  | 12 (23.5)                        | 11              | 9 (16.4)                         |
| Dental pain              | 1                   | 1 (2.0)                          | 5               | 3 (5.5)                          |
| Fatigue                  | 6                   | 4 (7.8)                          | 3               | 3 (5.5)                          |
| Gynecological disorders  | 0                   | 0 (0.0)                          | 13              | 8 (14.5)                         |
| Digestive disorders      | 16                  | 10 (19.6)                        | 12              | 10 (18.2)                        |
| Dermatological disorders | 3                   | 3 (5.9)                          | 3               | 3 (5.5)                          |
| Infections COVID         | 2                   | 2 (3.9)                          | 1               | 1 (1.8)                          |
| Urinary tract infections | 0                   | 0 (0.0)                          | 2               | 2 (3.6)                          |

AE, adverse event; COVID, coronavirus disease; n, number of AEs, n', number of participants.
